1 Title: Habitat patch size and tree species richness shape the bird community in urban green  
2 spaces of rapidly urbanizing region of India.

3

4 Monica Kaushik<sup>1\*</sup>, Samakshi Tiwari<sup>2</sup>, Kumari Manisha

5 <sup>1</sup>School of Human Ecology, Ambedkar University Delhi.

6 <sup>2</sup>Himachal Pradesh Forest Department

7 **ORCID ID:**

8 Monica Kaushik: <https://orcid.org/0000-0002-2020-1278>

9 Samakshi Tiwari: <https://orcid.org/0000-0002-2786-0727>

10 Kumari Manisha: <https://orcid.org/0000-0002-2547-8495>

11

12

13

14

15

16

17

18

19

20

21 \*Corresponding Author

22 Email: [monicak@aud.ac.in](mailto:monicak@aud.ac.in) (MK)

23

24 **Abstract**

25 Rapid urbanization and associated biodiversity loss is rampant globally but especially a cause of  
26 concern for developing countries. However, numerous studies investigating the role of urban  
27 green spaces have established their key role in conserving larger suites of species in urban area.  
28 Yet our knowledge is lopsided due to lag in research in developing countries. We examined how  
29 landscape and local scale features of urban green spaces influence bird species richness, density,  
30 fine-foraging guild richness and composition during breeding and non-breeding season. This is  
31 the first study of this nature in one the Himalayan states of India. We quantified landscape level  
32 variables in the 250m buffer around 18 urban green spaces. We sampled vegetation and bird  
33 community during breeding and non-breeding season through 52 intensive sampling point spread  
34 across 18 urban green spaces. Size of the urban green space at landscape level and tree richness  
35 at the local scale emerged as important predictor variables influencing bird species richness,  
36 density and richness of imperiled insectivorous guild across seasons. Urban green spaces within  
37 education institutions and offices experiencing much less management supported higher bird  
38 richness and density whereas city parks were the most species poor. Community composition  
39 was affected more strongly by built-up cover and barren area in the matrix and also by tree  
40 species richness within urban green spaces. City planners should focus on establishing larger  
41 city parks during design stage whereas biodiversity potential of the existing urban green spaces  
42 could be enhanced by selecting native tree and shrub species to increase overall habitat  
43 complexity.

44 **Keywords:** Species-area effect, Urban green space, City parks, Uttarakhand, Habitat  
45 heterogeneity

46

## 47 **Introduction**

48 Urban expansion is one of the biggest threats to biodiversity (Kang et al., 2015). In 2018, 55% of  
49 the world's population was living in urban areas, which is expected to increase to 68% by 2050  
50 (DESA, 2018). A sizeable amount of this expansion is expected from developing countries like  
51 India, China, and Nigeria. Urban areas are characterized by a mix of variety of grey and green  
52 spaces accommodating a large suite of common and highly plastic species. However, urban areas  
53 are also inhabited by few threatened species (Ives et al., 2016). Both common and threatened  
54 species play significant role in urban ecosystem functioning and provides multitude of ecosystem  
55 services. For example, in an experimental study conducted across three towns of UK reported  
56 higher amount of carcass removal in the presence of three urban vertebrate scavengers than in  
57 their absence (Inger et al., 2016). Varying in size and shape green spaces in urban areas ranges  
58 from city parks, remnant forest patches, golf courses to cemeteries act as hotspots of biodiversity  
59 (Gallo et al., 2017; Wurth et al., 2020). Variety of green habitats in urban areas covered partially  
60 or completely by any type of vegetation under private or public ownership are collectively  
61 known as urban green spaces.

62 In past decade, urban green spaces have received much required attention as a  
63 conservation tool for urban biodiversity. Urban green spaces can support endemic native species  
64 (Carbó-Ramírez & Zuria, 2011), mitigate urban heat island effect (Park et al., 2017; Xiao et al.,  
65 2018), ensure mental wellbeing of the visitors (Carrus et al., 2015) and prevent “extinction of  
66 experience” in human population residing in urban areas (Soga & Gaston, 2016). Studies  
67 focusing on habitat characteristics of urban greenspaces can improve biodiversity conservation  
68 potential (Aronson et al., 2017).

69 Previous studies have investigated the habitat features of the greenspaces largely at patch  
70 scale. Patch size emerges as an universal predictors across studies that improve biodiversity  
71 potential of greenspaces, conforming species-area relationship in urban ecosystem (Chamberlain  
72 et al., 2007; Dale, 2018; La Sorte et al., 2020; Matthies et al., 2015; Nielsen et al., 2014). Other  
73 than size of the park, habitat diversity within the urban green space and its age also positively  
74 influence the biodiversity (Zivanovic & Luck, 2016). Degree of connectivity among urban green  
75 spaces increases richness by allowing immigration of species from source habitats to other  
76 potential habitat (Braaker et al., 2017; Shanahan et al., 2011).

77 Urban green spaces are nested in varied matrix of habitat types that ranges from  
78 completely urban to a remnant forest patches. These habitats surrounding habitats, also known as  
79 matrix, can substantially influence the species richness and composition within the greenspaces.  
80 For example, higher proportion of “built-up” area in the matrix negatively affects the richness of  
81 bird species of the urban green spaces at community (Murgui, 2009) and guild level (Amaya-  
82 Espinel et al., 2019; Chamberlain et al., 2007; Fischer et al., 2016; Pellissier et al., 2012). Matrix  
83 with no or low management interventions such as fallow land or abandoned successional habitats  
84 often provide distinct resources and thereby elevate species richness of certain taxa (Melliger et  
85 al., 2017).

86 At the local scale, habitat heterogeneity within the urban green spaces in form of  
87 vegetation structure and complexity increases the richness and diversity of multiple taxa (Kang  
88 et al., 2015; Nielsen et al., 2014). Additionally, increase in tree and shrub diversity support  
89 faunal diversity at the local scale (Nielsen et al., 2014). Shrub cover could have different effects  
90 on richness depending on the focal taxa. Increasing shrub cover especially in highly urbanized  
91 matrix improved richness of highly imperiled insectivorous bird taxa (Pellissier et al., 2012) but

92 reduced bee richness by reducing their nesting resources (Banaszak-Cibicka et al.,  
93 2016). Information on habitat features that improve the biodiversity potential of urban green  
94 spaces could be used by the urban planner and managers at design and maintenance stages of  
95 urban greening projects (Callaghan et al., 2018).

96 In this study we investigated how habitat features of urban green spaces at  
97 landscape and local scale affects the bird community and fine-foraging guilds during breeding  
98 and non-breeding seasons. Additionally, we investigated if bird species composition varies  
99 across urban green spaces and if so, which factors are responsible for the differences. We  
100 selected birds owing to the ease of quantification as well as their property of being a good  
101 surrogate of overall biodiversity (Eglington et al., 2012). Birds are also important ecosystem  
102 service providers especially in tropical countries where majority of plants depend on bird-  
103 mediated seed dispersal (Sekercioglu et al., 2016; Whelan et al., 2008), preventing crop damage  
104 by arthropods control (Maas et al., 2016) and pollination (S. H. Anderson et al., 2016).  
105 Therefore, conservation of birds through urban green spaces ensures maintenance of diverse  
106 ecosystem services provided by them in urban areas. Our aim was to examine whether and how  
107 urban green spaces can be planned and managed to improve species richness, density, and guild  
108 richness in urban ecosystem.

109

## 110 **Materials and methods**

### 111 **Study Area**

112 We carried out this study in Dehradun city (30.3165° N, 78.0322° E) which is the capital of the  
113 northern state, Uttarakhand, India. It is located at the foothills of Himalaya flanked by two  
114 important rivers, Yamuna and Ganga. Dehradun is a valley spread across an area of 3088

115 km<sup>2</sup>with moderate variation in elevation (410m-700m). The city is characterized by mild weather  
116 throughout the year, but winter's temperature could be as low as 0-1°C and the maximum  
117 temperature in summers could be as high as 40°C. However, maximum temperature during  
118 summer is increasing. For example, in 2019 a maximum temperature of 44°C was recorded for  
119 the first time in the month of May. The area receives an average annual rainfall of 2073 mm,  
120 largely during the monsoon season (July-August).

121 Uttarakhand state was carved out from the Uttar Pradesh in year 2000 and Dehradun was  
122 designated its capital. Changed political status resulted in push towards infrastructural and  
123 developmental activities at the cost of the agricultural, forest and open areas. Between the years  
124 2001 and 2011 Dehradun experienced rapid population growth  
125 (<https://www.census2011.co.in/census/district/578-dehradun.html>). Though Dehradun has 64  
126 city parks ([http://smartcities.gov.in/upload/uploadfiles/files/Annexures\\_Dehradun.pdf](http://smartcities.gov.in/upload/uploadfiles/files/Annexures_Dehradun.pdf)), most of  
127 these are small parks constructed within residential colonies. Majority of urban green spaces in  
128 Dehradun – and other cities within India –are in the form of personal gardens, fruit orchards, tea  
129 gardens, tree belts along *nallahs* and reserved forests. In recent years, green spaces in Dehradun  
130 have shrunk due to increasing built-up for residential, commercial, and industrial purposes(Dutta  
131 et al., 2015). However, abutting Himalayan foothills Dehradun harbors 42% (567 of 1338) of the  
132 avifaunal diversity of India and 82% (567 of 688) of Uttarakhand state ([www.ebird.org/India](http://www.ebird.org/India)).  
133 Different habitats within the city provide safe breeding and wintering ground to the summer and  
134 winter migratory birds(Mohan, 2007).

### 135 **Study site selection**

136 We selected sites across a gradient of urban green space size using satellite imagery of Google  
137 Earth (*Google Earth Pro*, 2018). While selecting sites we made sure that the sites were spatially

138 distributed evenly across the city. Sites were visited for ground-truthing to assess the suitability  
139 in terms of accessibility and vegetation type. We avoided orchard of cash crops which generally  
140 lack shrub layer and are not open to public. We did choose one old tea plantation due to its large  
141 size, presence of native trees and continuous reporting of rare birds (e.g., Himalayan Griffon  
142 *Gyps himalayensis*, Yellow-eyed Babbler *Chrysomma sinense*). Out of 28 urban green spaces  
143 identified using Google Earth imagery, 18 sites were shortlisted for the study (Figure 1). Using  
144 ArcGIS (version 10.6) we measured the area of selected sites. We quantified the matrix  
145 composition around each urban green spaces within a buffer of 250 m using ArcGIS (version  
146 10.6) software. The following landuse types- agricultural field, green cover (including  
147 woodland), open (scrubland) areas, water cover, built-up and barren were digitized using  
148 polygon tool of Google Earth and later quantified for their extent using the ArcGIS (version  
149 10.6).

150

### 151 **Quantification of habitat structure and composition**

152 Each urban green space was divided into sampling grids of 200m and the centroids of the grid  
153 were selected for intensive vegetation and bird sampling. At each plot we recorded structural and  
154 compositional features of the vegetation by quantifying the trees and shrubs within concentric  
155 plots of 20m and 5m radius, respectively. For structural features of the tree layer we recorded  
156 girth at breast height, total and bole height and canopy spread in two perpendicular axes. Bole  
157 and total height of the tree was quantified using an altimeter. For shrub structural features we  
158 recorded average height for each shrub species and its spread within 5m radius plot. We recorded  
159 each tree and shrub to species level with the help of available field guides (Kanjilal & Gupta,  
160 1979)

161

## 162 **Sampling bird community**

163 We sampled bird community using the variable radius point transect method centered on the  
164 vegetation sampling plots. We choose point transects for sampling birds as well-spaced point  
165 transects could provide finer information than line-transects about the bird-habitat relationship if  
166 habitat parameters are quantified around the points (Bibby et al., 2000).

167 All the point transects were conducted by only a single observer in one season (ST:  
168 nonbreeding season and KM: breeding season) to avoid observer bias and all species seen or  
169 heard were recorded at the point. The observer also recorded the radial distance of each  
170 observation using a laser rangefinder. Bird sampling was carried out in morning hours (6:00 am  
171 – 9:00 am) during breeding (March-May) and non-breeding season (September-December). Each  
172 site was visited four times each within breeding and non-breeding season. Species were recorded  
173 for 7 minutes after 3 minutes of acclimatization time. To capture the maximum species variation  
174 within a season, each site was revisited after a week. The order of visiting the points was  
175 reversed on each morning to negate the bias due to flushing of birds by observer. A total of 416  
176 (52 points x 4 times x 2 seasons) variable radius point transects were undertaken during the study  
177 period.

178

## 179 **Data analysis**

180 For each urban green space, we estimated the richness for bird, tree and shrub species using  
181 package vegan (Oksanen et al., 2013) within R platform(R Core Team, 2019). We estimated bird  
182 species richness separately for each season using first-order jackknife richness estimator. Overall



183 bird density for each urban green space was estimated using the program DISTANCE 7.3  
184 (Thomas et al., 2010).  
185 We used linear modeling approach to evaluate the relationship between landscape and local scale  
186 variables on bird species richness, overall bird density and richness of fine-foraging guild. We  
187 categorized birds into their fine-foraging guilds using the information provided by Mohan (2007)  
188 in the same site. We used generalized linear models with Poisson family for modeling the guild  
189 species richness. Considering the differences in spatial scales, we built models separately for  
190 landscape and local scale variables (Electronic supplementary material A, B, C and D).

191 Area of urban green space was log transformed for all analysis. We built models with  
192 only uncorrelated variables and selected the best model through an information criterion model  
193 selection approach (Burnham & Anderson, 2010). We used Akaike information criterion for  
194 small sample sizes (AICc) for model selection since the ratio of sample size (n) and number of  
195 parameters (K) was small (i.e., <40;(Burnham and Anderson 2010)). The model with the lowest  
196 AICc value and within 2  $\Delta$ AICc was selected as the best model(s). To estimate model  
197 coefficients, we used model averaging whenever there were more than one models within 2  
198  $\Delta$ AICc values. Model averaging was performed using package MuMIn in R(Barton & Barton,  
199 2015). We estimated the back transformed estimate and standard error of variables in the best  
200 model using package *arm* (Gelman et al., 2018).

201 We used Non-Metric Multidimensional Scaling (NMDS) to explore differences in bird  
202 species composition across each urban green space and the associated landscape and local-scale  
203 variables. We choose Bray-curtis dissimilarity index, which works well with the abundance data  
204 (M. Anderson, 2001). Rare and vagrant species seen only once during the study period were  
205 removed for performing this analysis. We explored the relationship between NMDS axis and the

206 habitat covariates using the function *envfit* in package *vegan*. We used *adonis* test to explore if  
207 the bird species composition varied with the size and type of the urban green space. All statistical  
208 analyses were performed using program the R version 3.6.0 (R Core Team, 2019) and graphical  
209 visualization were created using *ggplot2* (Wickham, 2016).

210

## 211 **Result**

### 212 *Habitat characterization of the urban green spaces*

213 We selected 18 urban green spaces of which six were educational institutions, four city parks,  
214 four residential complex, three offices parks and one old abandoned tea plantation. The area of  
215 urban green spaces varied from 0.3ha to 224 ha (Table 1), where abandoned tea plantation was  
216 the largest urban green spaces. The urban matrix around urban green spaces had relatively higher  
217 proportion of “built-up” than other land use types (Table 1). The second most abundant landuse  
218 type in the matrix was “green cover” that varied from 5.96 % to 60% (Table 1). Agricultural area  
219 was the least dominant landuse type in the matrix and ranged between 0 to 16% (Table 1). We  
220 recorded a total of 92 trees species and 112 shrubs species from the entire study area.

221

222 Table 1: Average value of landscape and local scale variables across 18 urban green spaces of  
223 Dehradun, Uttarakhand, India.

| <b>Variable</b>                    | <b>Mean± Standard Deviation</b> | <b>Range</b> |
|------------------------------------|---------------------------------|--------------|
| <i>Landscape level variable</i>    |                                 |              |
| Perimeter of urban green space(km) | 1.74 ± 224                      | 21.8 – 1024  |
| Area of urban green space(ha)      | 21 ± 52                         | 0.3 –224.5   |
| Buffer area (ha)                   | 81 ± 118                        | 4 – 490.8    |
| Barren land (ha)                   | 18 ± 51                         | 0.3 – 219.8  |

|                        |         |            |
|------------------------|---------|------------|
| Built-up area (ha)     | 32 ± 23 | 0.2 – 86.4 |
| Green area (ha)        | 22 ± 19 | 3.5 – 88.1 |
| Open area (ha)         | 03 ± 8  | 0 – 36     |
| Area under water (ha)  | 1 ± 4   | 0 – 17.4   |
| Agricultural land (ha) | 6 ± 12  | 0 – 43.20  |

*Local level variable*

|                                      |               |            |
|--------------------------------------|---------------|------------|
| Tree G.B.H (cm)                      | 87.33 ± 61.21 | 31 – 480   |
| Tree Height (m)                      | 12.54 ± 5.95  | 1–35       |
| Tree Bole height (m)                 | 4.43 ± 3.60   | 0 –18.5    |
| Tree Canopy cover (m <sup>2</sup> )  | 52.06 ± 76.21 | 0–980.95   |
| Tree species richness (Jackknife 1)  | 12.94±10.09   | 1-29.2     |
| Shrub height (m)                     | 1.01 ± 0.95   | 0.1–6      |
| Shrub spread (m <sup>2</sup> )       | 3.36 ± 3.70   | 0.01–19.63 |
| Shrub species richness (Jackknife 1) | 12.35 ± 9.86  | 1– 40.5    |

224

225 *Bird species richness and density*

226 A total of 139 (4399 detections) species were recorded during the study period covering breeding  
 227 and non-breeding season. Like other studies from this region conducted in natural  
 228 forest(Kaushik, 2016)and urban forests (Mohan, 2007), bird species richness was higher during  
 229 the breeding (123 species) than the non-breeding season (103 species) (Figure 2a). Older  
 230 government institutes for education and research had the highest bird species richness whereas  
 231 city parks had the lowest richness, consistently across breeding and non-breeding season. Overall  
 232 bird density per hectare varied from 11.54<sub>Mean</sub>± 10.43<sub>%cv</sub> to 143.02<sub>Mean</sub> ± 19.36<sub>%cv</sub> during  
 233 breeding season and 17.84<sub>Mean</sub>± 20.44<sub>%cv</sub> to 154.83<sub>Mean</sub>± 16.99<sub>%cv</sub> during non-breeding season.  
 234 Urban green spaces within institutes and residential complexes had higher density during the  
 235 breeding season than non-breeding season (Figure 2b). City park exhibited a high variation in  
 236 bird density during the breeding season than non-breeding season.

237 Of the models explaining variation in bird species richness, the model containing only the urban  
 238 green spaces size best explained the data during breeding season and non-breeding season (Table  
 239 2). The top model for the species richness explained 99% and 96% of the variation in data during  
 240 breeding and non-breeding season, respectively (see electronic supplementary material A).  
 241 Moreover, the effect size was more pronounced for the breeding than the non-breeding season  
 242 (Table 2, Figure 3). At the local scale, top two models containing tree richness and a  
 243 combination of tree and shrub richness, representing overall plant species richness, explained the  
 244 data across breeding and non-breeding seasons. Two models cumulatively explained 98% of the  
 245 variation in the data.  
 246 Table 2: Summary of the best model showing variables, coefficient estimates, standard error, and  
 247 associated t-value for effect of landscape and local scale features on bird community features  
 248 during breeding and non-breeding season.

| <b>Community feature</b>     | <b>Scale</b> | <b>Season</b> | <b>Variable of best model</b> | <b><math>\beta</math>-estimate</b> | <b>SE</b> | <b>t-value</b> |
|------------------------------|--------------|---------------|-------------------------------|------------------------------------|-----------|----------------|
| <i>Bird species richness</i> | Landscape    | Breeding      | Area of urban green space     | 10.13                              | 1.61      | 6.30           |
|                              |              | Non-breeding  | Area of urban green space     | 6.46                               | 1.41      | 4.58           |
|                              | Local        | Breeding      | Tree richness                 | 1.32                               | 0.36      | 3.39           |
|                              |              |               | Shrub richness                | 0.58                               | 0.36      | 1.48           |
|                              |              | Non-breeding  | Tree richness                 | 0.80                               | 0.29      | 2.56           |
|                              |              |               | Shrub richness                | 0.43                               | 0.29      | 1.37           |
| <i>Bird density</i>          | Landscape    | Breeding      | Area of urban green space     | 12.72                              | 5.37      | 2.37           |
|                              |              | Non-breeding  | % of open area                | 3.02                               | 0.62      | 4.91           |
|                              | Local        | Breeding      | Tree richness                 | 2.14                               | 0.66      | 2.99           |
|                              |              |               | Shrub richness                | 0.84                               | 0.69      | 1.11           |

Non-breeding    Null Model                    -           -           -

---

249  
250 Overall bird density was explained by the park size during breeding (Table 2, Figure 4a) and at  
251 the local scale by additive effect of tree and shrub richness within the park (Table 2, Figure 4b &  
252 4c). During non-breeding season, landscape level variable, i.e., percentage of open area in the  
253 matrix explained the variation in overall density (Table 2, Figure 4d). However, none of the  
254 local variables explained variation in density during non-breeding season (Table 2). The top  
255 model containing landscape level variables explained 50% and 88% of the variation in the  
256 overall density during breeding and non-breeding season respectively (see electronic  
257 supplementary material B). At the local scale the top model explained 94% of the variation in the  
258 overall bird density during the breeding season and no model was selected during the non-  
259 breeding season (see electronic supplementary material B).

260  
261 Richness of all insectivore guilds except ground insectivore increased with increasing area of the  
262 urban green spaces across breeding and non-breeding season (Table 3 & Table 4). Percentage of  
263 barren area in surrounding matrix caused increase in richness of sallying insectivore and  
264 granivore guild during breeding season. However, during non-breeding season only ground  
265 insectivore guild richness increased with increasing percentage of barren area in the surrounding  
266 matrix. Increase in percentage of built-up area in the matrix caused decline in richness of ground  
267 insectivore guild (Table 4). Frugivore-insectivore guild's richness during non-breeding season  
268 increased with increasing percentage of agriculture area in the matrix. At local-scale tree species  
269 richness positively influenced richness of insectivorous guild richness during breeding and non-  
270 breeding season (Table 3 & 4). Richness of few guilds such as nectar-insectivore, fruit-seed-

271 nectar and fruit-seed-nectar-insectivore was not explained by either landscape or local-scale  
 272 variables (see electronic supplementary material C & D).  
 273  
 274 Table 3: Variable estimates, standard errors, and Z-value of the predictor variables of the best  
 275 models results, for fine-foraging guild species richness during breeding season at 18 urban green  
 276 spaces in Dehradun, India. \* Model built without one extremely disturbed urban green space site.  
 277 Only guilds for which removal resulted a change in best model is depicted here in addition to the  
 278 analysis with all sites.  
 279

| <b>Fine-foraging Guild</b> | <b>Variable of best model</b> | <b><math>\beta</math>-estimate</b> | <b>SE</b> | <b>Z-value</b> |
|----------------------------|-------------------------------|------------------------------------|-----------|----------------|
| <i>Landscape scale</i>     |                               |                                    |           |                |
| Understory insectivore     | Area of urban green space     | 1.21                               | 1.06      | 3.11           |
| Sallying insectivore       | Area of urban green space     | 1.28                               | 1.11      | 2.12           |
|                            | % of barren                   | 1.02                               | 1.01      | 2.06           |
| Canopy insectivore         | Area of urban green space     | 1.47                               | 1.11      | 3.60           |
| Ground insectivore         | Null model                    | –                                  | –         | –              |
| Frugivore insectivore      | % of barren                   | -1.03                              | 1.02      | -1.52          |
|                            | Area of urban green space     | 1.19                               | 1.09      | 1.83           |
|                            | % of agriculture              | 1.03                               | 1.03      | 1.15           |
| Trunk-bark foragers        | Null Model                    | –                                  | –         | –              |
| Trunk-bark foragers*       | Area of urban green space     | 1.82                               | 1.34      | 2.03           |
| Granivore                  | % of barren                   | 1.02                               | 1.01      | 2.08           |
| Granivore                  | % of agriculture              | 1.05                               | 1.03      | 1.28           |

|                               |                           |       |      |       |
|-------------------------------|---------------------------|-------|------|-------|
| Omnivore                      | Area of urban green space | 1.27  | 1.09 | 2.63  |
| Nectar insectivore            | Null model                | –     | –    | –     |
| Fruit-seed-nectar             | Null model                | –     | –    | –     |
| Fruit-seed-nectar-insectivore | Null model                | –     | –    | –     |
| <i>Local scale</i>            |                           |       |      |       |
| Understory insectivore        | Tree richness             | 1.06  | 1.01 | 3.28  |
| Sallying insectivore          | Tree richness             | 1.03  | 1.01 | 2.15  |
|                               | Tree girth                | -1.01 | 1.00 | -1.77 |
| Canopy insectivore            | Tree richness             | 1.03  | 1.01 | 2.20  |
|                               | Shrub cover               | 1.21  | 1.06 | 2.78  |
|                               | Shrub richness            | 1.02  | 1.02 | 1.08  |
| Ground insectivore            | Average tree height       | -1.17 | 1.06 | -2.58 |
| Frugivore insectivore         | Null Model                | –     | –    | –     |
| Trunk-bark foragers           | Null Model                | –     | –    | –     |
| Trunk-bark foragers*          | Tree richness             | 1.05  | 1.02 | 2.10  |
| Granivore                     | Null model                | –     | –    | –     |
| Omnivore                      | Null model                | –     | –    | –     |
| Nectar insectivore            | Null model                | –     | –    | –     |
| Fruit-seed-nectar             | Null model                | –     | –    | –     |
| Fruit-seed-nectar-insectivore | Null model                | –     | –    | –     |

280

281 Table 4: Variable estimates, standard errors, and Z-value of the predictor variables of the best  
 282 models results, which predicted fine-foraging guild species richness during non-breeding season  
 283 at 18 urban green spaces in Dehradun, India. \* Model built without one extremely disturbed  
 284 urban green space site. Only guilds for which removal resulted a change in best model is  
 285 depicted here in addition to the analysis with all sites.

| <b>Fine-foraging Guild</b> | <b>Variable of best model</b> | <b>β-estimate</b> | <b>SE</b> | <b>Z-value</b> |
|----------------------------|-------------------------------|-------------------|-----------|----------------|
|----------------------------|-------------------------------|-------------------|-----------|----------------|

---

*Landscape scale*

|                               |                           |       |      |       |
|-------------------------------|---------------------------|-------|------|-------|
| Understory insectivore        | Area of urban green space | 1.23  | 1.06 | 3.49  |
| Sallying insectivore          | Area of urban green space | 1.21  | 1.08 | 2.47  |
| Canopy insectivore            | Area of urban green space | 1.32  | 1.13 | 2.14  |
|                               | % of open area            | 1.14  | 1.07 | 1.76  |
| Ground insectivore            | % built up                | -1.02 | 1.01 | -2.21 |
|                               | % barren                  | 1.02  | 1.01 | 2.42  |
| Frugivore-insectivore         | % barren                  | -1.02 | 1.02 | -1.14 |
|                               | % agriculture             | 1.09  | 1.03 | 2.66  |
|                               | Area of urban green space | 1.32  | 1.12 | 2.25  |
| Trunk-bark foragers           | Null Model                | –     | –    | –     |
| Trunk-bark foragers*          | Area of urban green space | 1.65  | 1.21 | 2.61  |
| Granivore                     | Null Model                | –     | –    | –     |
| Omnivore                      | Null Model                | –     | –    | –     |
| Omnivore*                     | Area of urban green space | 1.32  | 1.13 | 2.17  |
| Nectar-insectivore            | Null Model                | –     | –    | –     |
| Fruit-seed nectar             | Null Model                | –     | –    | –     |
| Fruit-seed nectar insectivore | Null Model                | –     | –    | –     |

*Local scale*

|                        |                       |      |      |       |
|------------------------|-----------------------|------|------|-------|
| Understory insectivore | Tree species richness | 1.03 | 1.01 | 3.84  |
| Sallying insectivore   | Tree species richness | 1.04 | 1.01 | 3.65  |
| Canopy insectivore     | Tree species richness | 1.03 | 1.01 | 2.36  |
| Ground insectivore     | Average tree girth    | 1.01 | 1.00 | -2.37 |
| Frugivore-insectivore  | Tree species richness | 1.03 | 1.01 | 2.37  |
| Trunk-bark foragers*   | Tree species richness | 1.04 | 1.01 | 2.37  |
| Granivore              | Average tree girth    | 1.01 | 1.00 | 1.87  |
| Granivore              | Tree species richness | 1.03 | 1.01 | 1.97  |
| Granivore              | Shrub richness        | 1.03 | 1.02 | 1.81  |
| Omnivore               | Null Model            | –    | –    | –     |



|                               |            |   |   |   |
|-------------------------------|------------|---|---|---|
| Nectar-insectivore            | Null Model | – | – | – |
| Fruit-seed nectar             | Null Model | – | – | – |
| Fruit-seed nectar insectivore | Null Model | – | – | – |

---

286

287 *Bird species composition*

288 Bird community composition in this study varied with urban green space area as well as with its  
289 type. As the urban green space become smaller in size, they become more dissimilar in bird  
290 species composition both during breeding ( $r= 0.32$ ,  $p=0.001$ ) and non-breeding ( $r= 0.32$ ,  
291  $p=0.005$ ) season. Bird species composition also varied between urban green space types for  
292 breeding ( $r= 0.40$ ,  $p=0.01$ ) and non-breeding season ( $r= 0.56$ ,  $p=0.001$ ). We choose two  
293 dimensional NMDS because its correlation with the original data was only slightly lower than for  
294 a three-dimensional solution (*breeding season*: Linear fit  $R^2 = 0.92$  vs.  $0.95$ ; *non-breeding*  
295 *season*: Linear fit  $R^2 = 0.88$  vs.  $0.92$ ), while being easier to interpret. Overall goodness-of-fit  
296 calculated as *stress* of the solution was low across seasons (*breeding season*: *Stress*= $0.11$ ; *non-*  
297 *breeding season*: *Stress*= $0.14$ ). Spread of urban green spaces followed a similar pattern across  
298 seasons where large and medium sized urban green spaces clustered together but small-sized  
299 urban green spaces clustered in opposite direction (Figure 5a and 5b). Yet, there were a few sites  
300 that fell between the two clusters. Although geographically apart, large urban green spaces  
301 clustered very closely to each other whereas medium and small-sized urban green spaces showed  
302 huge variation in their bird composition. Landscape and local scale habitat parameters in this  
303 study significantly correlated with the NMDS axes. Interestingly some habitat parameters i.e.,  
304 tree species richness, percentage of barren area, percentage of built-up and percentage of water,  
305 caused the differences in species composition across seasons. Whereas park size and percentage  
306 of agriculture land in the matrix influenced the community composition only during breeding

307 season and average tree girth during non-breeding season. NMDS 1 strongly positively  
308 correlated with urban green space size, percentage of agricultural areas in the matrix and tree  
309 richness during breeding season aligning with large sized urban green spaces. In both seasons  
310 small urban green spaces aligned along a gradient of percentage of built-up in opposite direction  
311 to large and medium sized urban green spaces (Figure 5a and 5b).

312

### 313 **Discussion**

314 With the expansion of urbanization, it is becoming urgent to create and maintain spaces for urban  
315 biodiversity. Most importantly, such decision for planning and development of urban green  
316 spaces need to have its foundation in scientific knowledge. Information on urban green space  
317 features that improves their biodiversity potential has accumulated over the past few decades  
318 (Callaghan et al., 2018; Nielsen et al., 2014; Threlfall et al., 2017). Yet our knowledge is  
319 lopsided due to paucity of information from megadiverse developing countries (Callaghan et al.,  
320 2018). This study is the first attempt in the Himalayan state of Uttarakhand, northern India, to  
321 investigate the role of landscape and local scale variables in improving overall and specialist  
322 guild richness.

323 In consensus with the previous studies, our findings establish the value of landscape as well as  
324 local scale variables in influencing the bird species richness in urban green spaces(Callaghan et  
325 al., 2018; Dale, 2018; Mayorga et al., 2020). We found that urban green space size plays an  
326 overwhelmingly important role in supporting higher overall bird richness, density, and richness  
327 of specialized foraging guilds. A more encouraging result of this study is the significant role of  
328 tree and shrub richness at local scale for the breeding and non-breeding bird community (Table  
329 2).

### 330 **Landscape scale determinants bird community characteristics**

331           Species-area effect has been observed in studies conducted within urban green spaces  
332 of a single city and across cities as well. Callaghan et.al (2018) used citizen science data on bird  
333 observations from 112 urban green spaces spread across 51 cities and observed a significantly  
334 positive association between bird species richness of both terrestrial and water birds. Larger  
335 urban green spaces are expected to have diverse habitat providing foraging and nesting resources  
336 to a diversity of bird species (Matthies et al., 2017).Habitat heterogeneity or patchiness could  
337 provide safe refuges to birds for evading predation consequently leading to higher richness over  
338 long term (Willson et al., 2001). Although we did not quantify habitat diversity within urban  
339 green spaces but larger urban green spaces in this study had variety of habitats starting from  
340 regenerating forest areas, grasslands, scrubs, and vacant lots.

341           Another mechanism for larger urban green spaces to support higher bird richness is  
342 through increased within patch structural heterogeneity, a property of rich plant community. In  
343 this study we too observed a strong correlation between tree ( $r = 0.80$ ,  $p < 0.001$ ) and shrub  
344 richness ( $r = 0.55$ ,  $p = 0.02$ ) with the urban green space size. Larger urban green spaces with  
345 higher forage and nesting resources would have a direct effect on the abundance of the individual  
346 species. We also observed this effect of size on overall bird density during breeding season when  
347 the two imminent requirement of the bird are food and suitable nest site.  
348 Overall bird density in this study increased with urban green space size during breeding season  
349 with percentage of open area in the matrix during non-breeding season (Figure 4a & 4d). This  
350 effect of park size on breeding bird abundance have been reported by other studies as well  
351 (Amaya-Espinel et al., 2019; Leveau & Leveau, 2016; Mayorga et al., 2020).

352 Linear relationship between urban green space size with breeding bird density could be attributed  
353 to productivity that is higher in green versus gray spaces (Shochat et al., 2006). Urban green  
354 spaces are also characterized by increased availability of subsidized food, lower diversity and  
355 density of natural predators, prolonged breeding period of birds due to lack of seasonality  
356 subsequently leading to higher abundance of birds, especially urban exploiters, and adapters.  
357 Studies conducted in urban areas usually find the density of few urban exploiters contributing to  
358 this overall increase. In our study too, during breeding season 14% of species (17 out of 123  
359 recorded) contributed to 67% and 63% (14 out of 103 recorded) of the total bird abundance  
360 during breeding and non-breeding season, respectively. All these highly abundant (*Acridotheres*  
361 *tristis*, *Columba livia*, *Spilopelia chinensis*, *Orthotomus sutorius*, *Corvus splendens*, *Pycnonotus*  
362 *cafer* etc.) species were also characterized by widespread presence in majority of the sites.  
363 During non-breeding season, overall bird density in this study increased with increasing  
364 percentage of open area in the matrix, a land use with no or minimal management of vegetation.  
365 Non-breeding season in this area is marked by harsh winters and influx of 80% of the Himalayan  
366 birds to foothills and plains, avoiding even harsher winters in their breeding grounds. On arrival  
367 winter migrants in this region form mixed-foraging flocks with resident birds and show strong  
368 heterospecific attraction (Kaushik et al., 2012). These migrants often affects low and medium  
369 intensity agricultural fields than primary forest (Elsen et al., 2017).  
370 Smaller urban green spaces in this study were nestled within the highly urbanized matrix,  
371 characterized by percentage of built-up (see Figure 5a and 5b). Although we did not find an  
372 impact of built-up area on the overall bird species richness but we did find a significant  
373 association with the bird species composition. Built-up area acts as barrier for movement  
374 between urban green spaces especially for disturbance sensitive ground dwelling and dispersal

375 limited species. We indeed observed a decline in ground insectivore guild richness with  
376 increasing built-up cover in the matrix (Table 4). Although the study area is urbanizing at a fast  
377 rate, the presence of reserve forests around the boundary, remnant agricultural areas, old  
378 institutes with ample green cover, practices of home gardening seems to compensate for the  
379 effect of sealed area.

### 380 **Local scale determinants bird community characteristics**

381 Tree richness at local scale had positive relationship with overall bird species richness, richness  
382 of most of the fine-foraging guilds, overall density, and bird species composition in our study.  
383 This relationship is also observed by other studies (da Silva et al., 2020; de Toledo et al., 2012;  
384 Khera et al., 2009). Increasing tree richness results in increase food and nesting resources for  
385 bird species. Tree richness is also positively related to foliage height diversity (Daniels et al.  
386 1992) and therefore provide different foraging niches to the birds (MacArthur & MacArthur,  
387 1961).

388 Contrary to our expectations we did not find effect of shrub richness on understory insectivore.  
389 We believe that this lack of relationship is due to the frequent control and management of shrub  
390 layer in the urban green spaces especially during the monsoon season to get rid of the insect and  
391 other pests. Effect of tree richness were more pronounced on the fine-foraging guilds of the birds  
392 and the species composition in our study. Richness of insectivores birds foraging in all stratum  
393 (understory, canopy, trunk-bark, air) increased with increasing tree richness. Tree richness  
394 potentially influence the richness of insectivorous guild by 1) increasing the foliage height  
395 diversity, 2) providing diverse food resources and by 3) providing cover from the predators  
396 (Evans et al., 2009). Other than tree richness, disturbance could negatively influence this group  
397 especially specialist group of Trunk-bark forager including woodpeckers. The largest site in this

398 study was an old abandoned tea plantation with high native trees richness but the trees are  
399 heavily used for collecting firewood and fodder leading to lower richness of this specialized  
400 guild.

#### 401 **Management implications**

402 Our study provides further support for the park size as an important factor for conserving larger  
403 part of the bird diversity in urban areas. This finding is relevant for the city planners during  
404 planning stage as large urban green spaces can support a much larger array of bird species than  
405 the small ones. Additionally, green spaces within university campuses, offices, residential  
406 complex can further support the urban bird diversity. Although urban sprawl is expected to  
407 reduce the amount of barren and open areas but certain features of these land uses such as low or  
408 no management of shrubs could be incorporated in one portion of the urban green space. Another  
409 important finding of this study was the overwhelming role of the tree richness in improving the  
410 bird community characteristics at guild and community level. This finding could be used to plan  
411 improve the habitat quality of the small and medium parks for improving their conservation  
412 potential for bird community. Considering the lack of space for planning large urban green  
413 spaces within already planned cities focus should be on increasing native tree and shrub cover to  
414 imperiled protect ground insectivore guild.

415

416

417

418

419

420

421  
422  
423  
424  
425  
426  
427  
428  
429  
430  
431  
432  
433  
434  
435  
436  
437  
438  
439  
440  
441  
442  
443

#### Acknowledgments

We thank the Rufford foundation for providing the small grant (Grant ID: 26698-1) to fund this research. We also thank Dr. V B Mathur, Director (Wildlife Institute of India), Dr. Geetika Mathur (Model School for visually handicapped), Saurabh Shanu (University of Petroleum and Energy Studies), Director General (Uttarakhand State Council for Science and Technology (Vigyan Dham), Archana Bahuguna, (Zoological Survey of India), staff of Tourism Office, Indu Singh, (Mahadevi Kanya Pathshala), for facilitating data collection in their institution's premises. We are thankful to Oindrila Basu, Aashu tomar, Sipu kumar, Shilky, Rachna Yadav, Mangal Singh Bisht, Ananthu P, Jason B. Coutinho, Partho Sarathi, and Saloni Singh for their voluntary help for assisting ST and KM in data collection. We are immensely grateful to Inam Ali for assisting us in bird and vegetation sampling.

444  
445  
446  
447  
448  
449  
450  
451

452 References

- 453 Amaya-Espinel, J. D., Hostetler, M., Henríquez, C., & Bonacic, C. (2019). The influence of building  
454 density on Neotropical bird communities found in small urban parks. *Landscape and Urban  
455 Planning, 190*, 103578. <https://doi.org/10.1016/j.landurbplan.2019.05.009>
- 456 Anderson, M. (2001). A new method for non-parametric multivariate analysis of variance. *Austral  
457 Ecology, 26*(1), 32–46.
- 458 Anderson, S. H., Kelly, D., Robertson, A. W., & Ladley, J. J. (2016). Pollination by Birds. *Why Birds  
459 Matter: Avian Ecological Function and Ecosystem Services, 73*.
- 460 Aronson, M. F., Lepczyk, C. A., Evans, K. L., Goddard, M. A., Lerman, S. B., MacIvor, J. S., Nilon, C.  
461 H., & Vargo, T. (2017). Biodiversity in the city: Key challenges for urban green space  
462 management. *Frontiers in Ecology and the Environment, 15*(4), 189–196.
- 463 Banaszak-Cibicka, W., Ratyńska, H., & Dylewski, Ł. (2016). Features of urban green space favourable  
464 for large and diverse bee populations (Hymenoptera: Apoidea: Apiformes). *Urban Forestry &  
465 Urban Greening, 20*, 448–452. <https://doi.org/10.1016/j.ufug.2016.10.015>
- 466 Barton, K., & Barton, M. K. (2015). Package ‘MuMIn.’ *Version, 1*, 18.
- 467 Bibby, C. J., Burgess, N. D., Hill, D. A., & Mustoe, S. (2000). *Bird census techniques*. Elsevier.



- 468 Braaker, S., Obrist, M. K., Ghazoul, J., & Moretti, M. (2017). Habitat connectivity and local conditions  
469 shape taxonomic and functional diversity of arthropods on green roofs. *Journal of Animal*  
470 *Ecology*, 86(3), 521–531. <https://doi.org/10.1111/1365-2656.12648>
- 471 Burnham, K. P., & Anderson, D. R. (2010). *Model selection and multimodel inference: A practical*  
472 *information-theoretic approach* (2. ed). Springer.
- 473 Callaghan, C. T., Major, R. E., Lyons, M. B., Martin, J. M., & Kingsford, R. T. (2018). The effects of  
474 local and landscape habitat attributes on bird diversity in urban greenspaces. *Ecosphere*, 9(7),  
475 e02347. <https://doi.org/10.1002/ecs2.2347>
- 476 Carbó-Ramírez, P., & Zuria, I. (2011). The value of small urban greenspaces for birds in a Mexican city.  
477 *Landscape and Urban Planning*, 100(3), 213–222.  
478 <https://doi.org/10.1016/j.landurbplan.2010.12.008>
- 479 Carrus, G., Scopelliti, M., Laforteza, R., Colangelo, G., Ferrini, F., Salbitano, F., Agrimi, M.,  
480 Portoghesi, L., Semenzato, P., & Sanesi, G. (2015). Go greener, feel better? The positive effects  
481 of biodiversity on the well-being of individuals visiting urban and peri-urban green areas.  
482 *Landscape and Urban Planning*, 134, 221–228.
- 483 Chamberlain, D. E., Gough, S., Vaughan, H., Vickery, J. A., & Appleton, G. F. (2007). Determinants of  
484 bird species richness in public green spaces. *Bird Study*, 54(1), 87–97.
- 485 da Silva, B. F., Pena, J. C., Viana-Junior, A. B., Vergne, M., & Pizo, M. A. (2020). Noise and tree species  
486 richness modulate the bird community inhabiting small public urban green spaces of a  
487 Neotropical city. *Urban Ecosystems*. <https://doi.org/10.1007/s11252-020-01021-2>
- 488 Dale, S. (2018). Urban bird community composition influenced by size of urban green spaces, presence of  
489 native forest, and urbanization. *Urban Ecosystems*, 21(1), 1–14.
- 490 de Toledo, M. C. B., Donatelli, R. J., & Batista, G. T. (2012). Relation between green spaces and bird  
491 community structure in an urban area in Southeast Brazil. *Urban Ecosystems*, 15(1), 111–131.  
492 <https://doi.org/10.1007/s11252-011-0195-2>

- 493 DESA, U. (2018). 68% of the world population projected to live in urban areas by 2050, says UN. *United*  
494 *Nations Department of Economic and Social Affairs*.
- 495 Dutta, D., Rahman, A., & Kundu, A. (2015). Growth of Dehradun city: An application of linear spectral  
496 unmixing (LSU) technique using multi-temporal landsat satellite data sets. *Remote Sensing*  
497 *Applications: Society and Environment, 1*, 98–111.
- 498 Eglington, S. M., Noble, D. G., & Fuller, R. J. (2012). A meta-analysis of spatial relationships in species  
499 richness across taxa: Birds as indicators of wider biodiversity in temperate regions. *Journal for*  
500 *Nature Conservation, 20*(5), 301–309. <https://doi.org/10.1016/j.jnc.2012.07.002>
- 501 Elsen, P. R., Kalyanaraman, R., Ramesh, K., & Wilcove, D. S. (2017). The importance of agricultural  
502 lands for Himalayan birds in winter. *Conservation Biology, 31*(2), 416–426.  
503 <https://doi.org/10.1111/cobi.12812>
- 504 Evans, K. L., Newson, S. E., & Gaston, K. J. (2009). Habitat influences on urban avian assemblages. *Ibis,*  
505 *151*(1), 19–39.
- 506 Fischer, L. K., Eichfeld, J., Kowarik, I., & Buchholz, S. (2016). Disentangling urban habitat and matrix  
507 effects on wild bee species. *PeerJ, 4*, e2729. <https://doi.org/10.7717/peerj.2729>
- 508 Gallo, T., Fidino, M., Lehrer, E. W., & Magle, S. B. (2017). Mammal diversity and metacommunity  
509 dynamics in urban green spaces: Implications for urban wildlife conservation. *Ecological*  
510 *Applications, 27*(8), 2330–2341.
- 511 Gelman, A., Su, Y.-S., Yajima, M., Hill, J., Pittau, M. G., Kerman, J., & Zheng, T. (2018). arm: Data  
512 analysis using regression and multilevel/hierarchical models, 2010. URL [Http://CRAN.R-Project.](http://CRAN.R-Project.Org/Package=Arm)  
513 [Org/Package= Arm. R Package Version](http://CRAN.R-Project.Org/Package=Arm), 1–3.
- 514 *Google Earth Pro* (30.3164945, 78.0321918 (Dehradun), Eye alt 20.63 mi; 7.3.3.7786.). (2018).  
515 [Computer software].
- 516 Inger, R., Cox, D. T., Per, E., Norton, B. A., & Gaston, K. J. (2016). Ecological role of vertebrate  
517 scavengers in urban ecosystems in the UK. *Ecology and Evolution, 6*(19), 7015–7023.

- 518 Ives, C. D., Lentini, P. E., Threlfall, C. G., Ikin, K., Shanahan, D. F., Garrard, G. E., Bekessy, S. A.,  
519 Fuller, R. A., Mumaw, L., & Rayner, L. (2016). Cities are hotspots for threatened species. *Global*  
520 *Ecology and Biogeography*, 25(1), 117–126.
- 521 Kang, W., Minor, E. S., Park, C.-R., & Lee, D. (2015). Effects of habitat structure, human disturbance,  
522 and habitat connectivity on urban forest bird communities. *Urban Ecosystems*, 18(3), 857–870.  
523 <https://doi.org/10.1007/s11252-014-0433-5>
- 524 Kanjilal, U., & Gupta, B. L. (1979). Forest Flora of Dehradun. *Bishen Singh Mahendra Pal Singh,*  
525 *Dehradun.*
- 526 Kaushik, M. (2016). *Influence of extractive disturbances on forest bird communities in Shiwalik*  
527 *landscape, India* [Saurashtra University, Rajkot, Gujarat]. <http://hdl.handle.net/10603/117780>
- 528 Kaushik, M., Mohan, D., & Singh, P. (2012). Response of migrant and resident bird communities to  
529 anthropogenic disturbances in Shiwalik landscape, Uttarakhand, India. *J. Bombay Nat. Hist. Soc.*,  
530 109, 111–122.
- 531 Khera, N., Mehta, V., & Sabata, B. C. (2009). Interrelationship of birds and habitat features in urban  
532 greenspaces in Delhi, India. *Urban Forestry & Urban Greening*, 8(3), 187–196.
- 533 La Sorte, F. A., Aronson, M. F., Lepczyk, C. A., & Horton, K. G. (2020). Area is the primary correlate of  
534 annual and seasonal patterns of avian species richness in urban green spaces. *Landscape and*  
535 *Urban Planning*, 203, 103892.
- 536 Leveau, L. M., & Leveau, C. M. (2016). Does urbanization affect the seasonal dynamics of bird  
537 communities in urban parks? *Urban Ecosystems*, 19(2), 631–647.
- 538 Maas, B., Karp, D. S., Bumrungsri, S., Darras, K., Gonthier, D., Huang, J. C.-C., Lindell, C. A., Maine, J.  
539 J., Mestre, L., & Michel, N. L. (2016). Bird and bat predation services in tropical forests and  
540 agroforestry landscapes. *Biological Reviews*, 91(4), 1081–1101.
- 541 MacArthur, R. H., & MacArthur, J. W. (1961). On bird species diversity. *Ecology*, 42(3), 594–598.

- 542 Matthies, S. A., Rüter, S., Prasse, R., & Schaarschmidt, F. (2015). Factors driving the vascular plant  
543 species richness in urban green spaces: Using a multivariable approach. *Landscape and Urban*  
544 *Planning*, 134, 177–187. <https://doi.org/10.1016/j.landurbplan.2014.10.014>
- 545 Matthies, S. A., Rüter, S., Schaarschmidt, F., & Prasse, R. (2017). Determinants of species richness  
546 within and across taxonomic groups in urban green spaces. *Urban Ecosystems*, 20(4), 897–909.
- 547 Mayorga, I., Bichier, P., & Philpott, S. M. (2020). Local and landscape drivers of bird abundance, species  
548 richness, and trait composition in urban agroecosystems. *Urban Ecosystems*, 1–11.
- 549 Melliger, R. L., Rusterholz, H.-P., & Baur, B. (2017). Habitat- and matrix-related differences in species  
550 diversity and trait richness of vascular plants, Orthoptera and Lepidoptera in an urban landscape.  
551 *Urban Ecosystems*, 20(5), 1095–1107. <https://doi.org/10.1007/s11252-017-0662-5>
- 552 Mohan, D. (2007). *Habitat selection of birds in New forest, Dehradun, India*. Forest Research Institute,  
553 Dehradun, India.
- 554 Murgui, E. (2009). Influence of urban landscape structure on bird fauna: A case study across seasons in  
555 the city of Valencia (Spain). *Urban Ecosystems*, 12(3), 249. [https://doi.org/10.1007/s11252-009-](https://doi.org/10.1007/s11252-009-0092-0)  
556 [0092-0](https://doi.org/10.1007/s11252-009-0092-0)
- 557 Nielsen, A. B., Van Den Bosch, M., Maruthaveeran, S., & van den Bosch, C. K. (2014). Species richness  
558 in urban parks and its drivers: A review of empirical evidence. *Urban Ecosystems*, 17(1), 305–  
559 327.
- 560 Oksanen, J., Blanchet, F. G., Kindt, R., Legendre, P., Minchin, P. R., O'hara, R. B., Simpson, G. L.,  
561 Solymos, P., Stevens, M. H. H., & Wagner, H. (2013). Package 'vegan.' *Community Ecology*  
562 *Package, Version*, 2(9), 1–295.
- 563 Park, J., Kim, J.-H., Lee, D. K., Park, C. Y., & Jeong, S. G. (2017). The influence of small green space  
564 type and structure at the street level on urban heat island mitigation. *Urban Forestry & Urban*  
565 *Greening*, 21, 203–212.

- 566 Pellissier, V., Cohen, M., Boulay, A., & Clergeau, P. (2012). Birds are also sensitive to landscape  
567 composition and configuration within the city centre. *Landscape and Urban Planning*, *104*(2),  
568 181–188. <https://doi.org/10.1016/j.landurbplan.2011.10.011>
- 569 R Core Team. (2019). *R: A language and environment for statistical computing*. R Foundation for  
570 *Statistical Computing, Vienna, Austria*. <https://www.R-project.org/>.
- 571 Sekercioglu, Ç. H., Wenny, D. G., & Whelan, C. J. (2016). *Why birds matter: Avian ecological function*  
572 *and ecosystem services*. University of Chicago Press.
- 573 Shanahan, D. F., Miller, C., Possingham, H. P., & Fuller, R. A. (2011). The influence of patch area and  
574 connectivity on avian communities in urban revegetation. *Biological Conservation*, *144*(2), 722–  
575 729. <https://doi.org/10.1016/j.biocon.2010.10.014>
- 576 Shochat, E., Warren, P. S., Faeth, S. H., McIntyre, N. E., & Hope, D. (2006). From patterns to emerging  
577 processes in mechanistic urban ecology. *Trends in Ecology & Evolution*, *21*(4), 186–191.
- 578 Soga, M., & Gaston, K. J. (2016). Extinction of experience: The loss of human-nature interactions.  
579 *Frontiers in Ecology and the Environment*, *14*(2), 94–101. <https://doi.org/10.1002/fee.1225>
- 580 Thomas, L., Buckland, S. T., Rexstad, E. A., Laake, J. L., Strindberg, S., Hedley, S. L., Bishop, J. R.,  
581 Marques, T. A., & Burnham, K. P. (2010). Distance software: Design and analysis of distance  
582 sampling surveys for estimating population size. *Journal of Applied Ecology*, *47*(1), 5–14.
- 583 Threlfall, C. G., Mata, L., Mackie, J. A., Hahs, A. K., Stork, N. E., Williams, N. S., & Livesley, S. J.  
584 (2017). Increasing biodiversity in urban green spaces through simple vegetation interventions.  
585 *Journal of Applied Ecology*, *54*(6), 1874–1883.
- 586 Whelan, C. J., Wenny, D. G., & Marquis, R. J. (2008). Ecosystem services provided by birds. *Annals of*  
587 *the New York Academy of Sciences*, *1134*(1), 25–60.
- 588 Wickham, H. (2016). *ggplot2: Elegant Graphics for Data Analysis*. Springer.
- 589 Willson, M. F., Morrison, J. L., Sieving, K. E., De Santo, T. L., Santisteban, L., & Díaz, I. (2001).  
590 Patterns of predation risk and survival of bird nests in a Chilean agricultural landscape.  
591 *Conservation Biology*, *15*(2), 447–456.

592 Wurth, A. M., Ellington, E. H., & Gehrt, S. D. (2020). Golf Courses as Potential Habitat for Urban  
593 Coyotes. *Wildlife Society Bulletin*, 44(2), 333–341. <https://doi.org/10.1002/wsb.1081>

594 Xiao, X. D., Dong, L., Yan, H., Yang, N., & Xiong, Y. (2018). The influence of the spatial characteristics  
595 of urban green space on the urban heat island effect in Suzhou Industrial Park. *Sustainable Cities  
596 and Society*, 40, 428–439.

597 Zivanovic, A. J., & Luck, G. W. (2016). Social and environmental factors drive variation in plant and bird  
598 communities across urban greenspace in Sydney, Australia. *Journal of Environmental  
599 Management*, 169, 210–222. <https://doi.org/10.1016/j.jenvman.2015.11.052>

600

601

602

603

604

605

606

607

608

609

610

611

612

613

614

615

616

617

618

619

620 **Figure Legends**

621

622 **Figure 1: Map of study area showing 18 urban green spaces selected for bird and**  
623 **vegetation sampling in Dehradun, Uttarakhand, India. The number allotted to each urban**  
624 **green space represents its location on the map.**

625

626 **Figure 2: a) Overall bird species richness and b) density across urban green space types**  
627 **during breeding and non-breeding season.**

628

629 **Figure 3: Relationship between bird species richness and area of the urban green spaces**  
630 **across breeding and non-breeding season.**

631

632 **Figure 4: Relationship of overall bird density with parameters of the best models a), b) & c)**  
633 **for breeding and d) non-breeding season.**

634

635 **Figure 5: Nonmetric multidimensional scaling (NMDS) ordination of the bird community**  
636 **during a) breeding and b) non-breeding season at the 18 urban green space season in**  
637 **Dehradun, Uttarakhand. Plots represents sites according to their similarity in species**  
638 **composition. The arrows are vectors of habitat parameters arrows represent vectors of the**  
639 **significant factors that contributed to the ordination ( $p < 0.05$ ).**

640

641

642



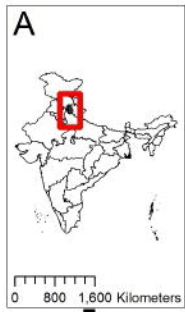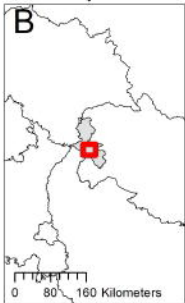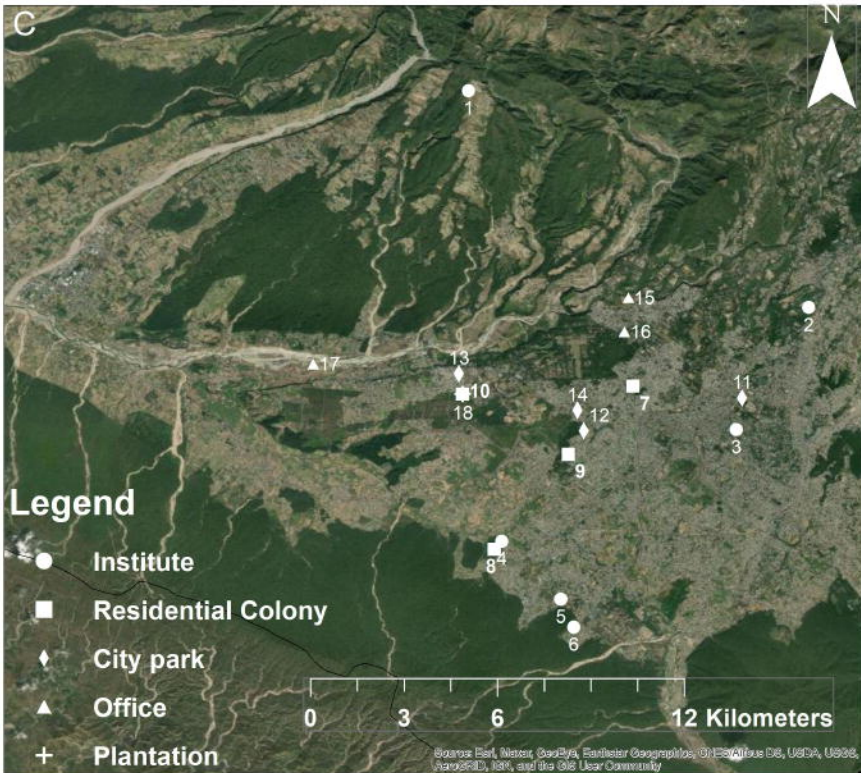

## Institutes

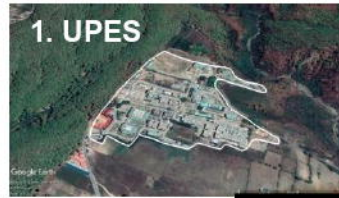

90 m

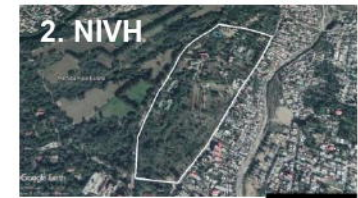

300 m

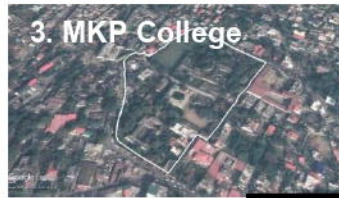

150 m

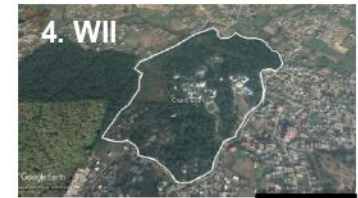

300 m

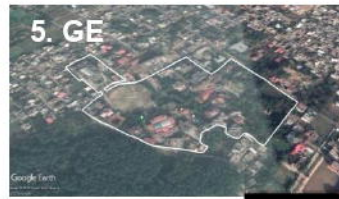

180 m

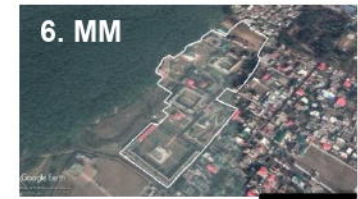

180 m

## Residential Colonies

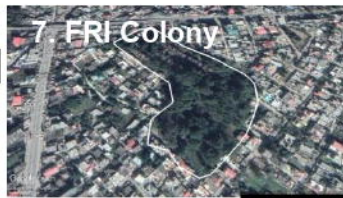

150 m

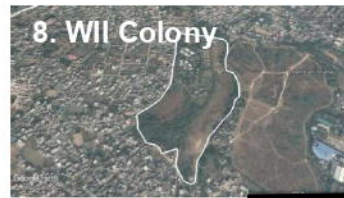

240 m

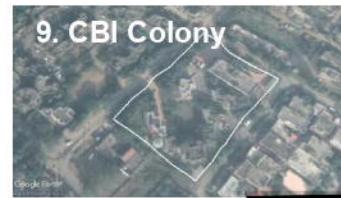

60 m

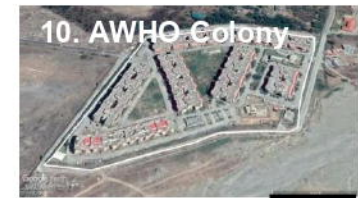

90 m

## City Parks

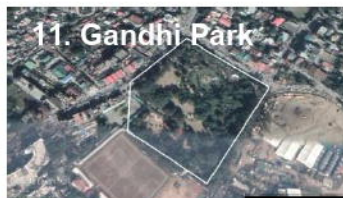

150 m

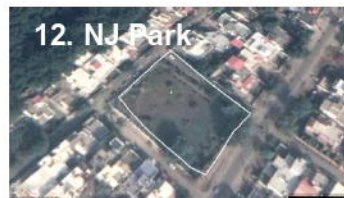

30 m

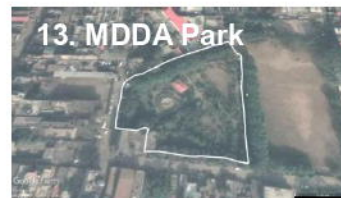

30 m

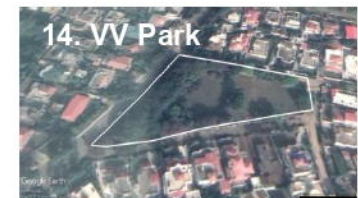

30 m

## Offices & Plantation

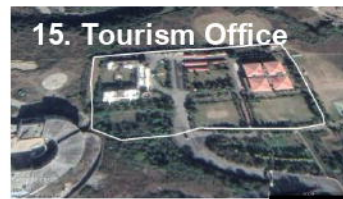

30 m

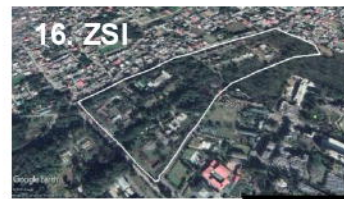

210 m

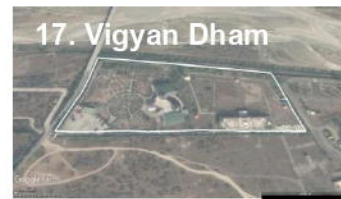

180 m

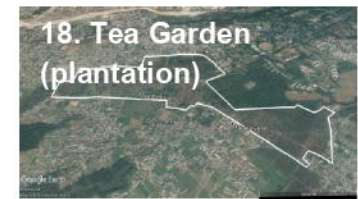

910 m



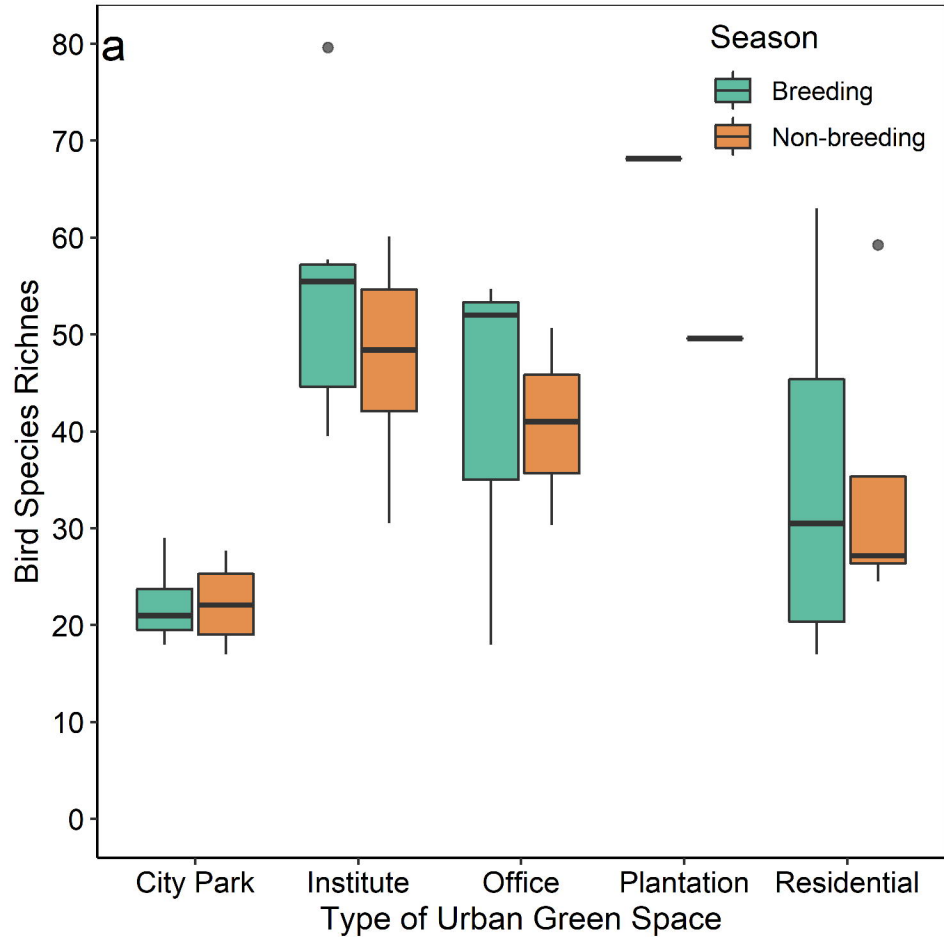

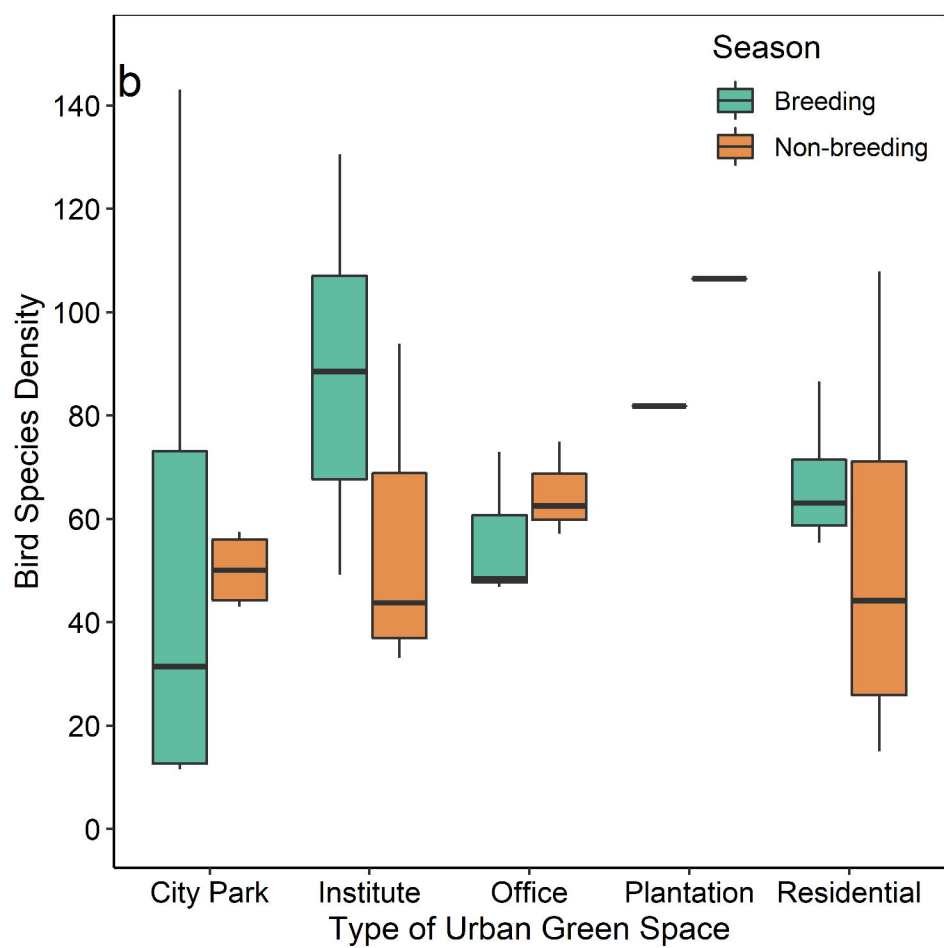

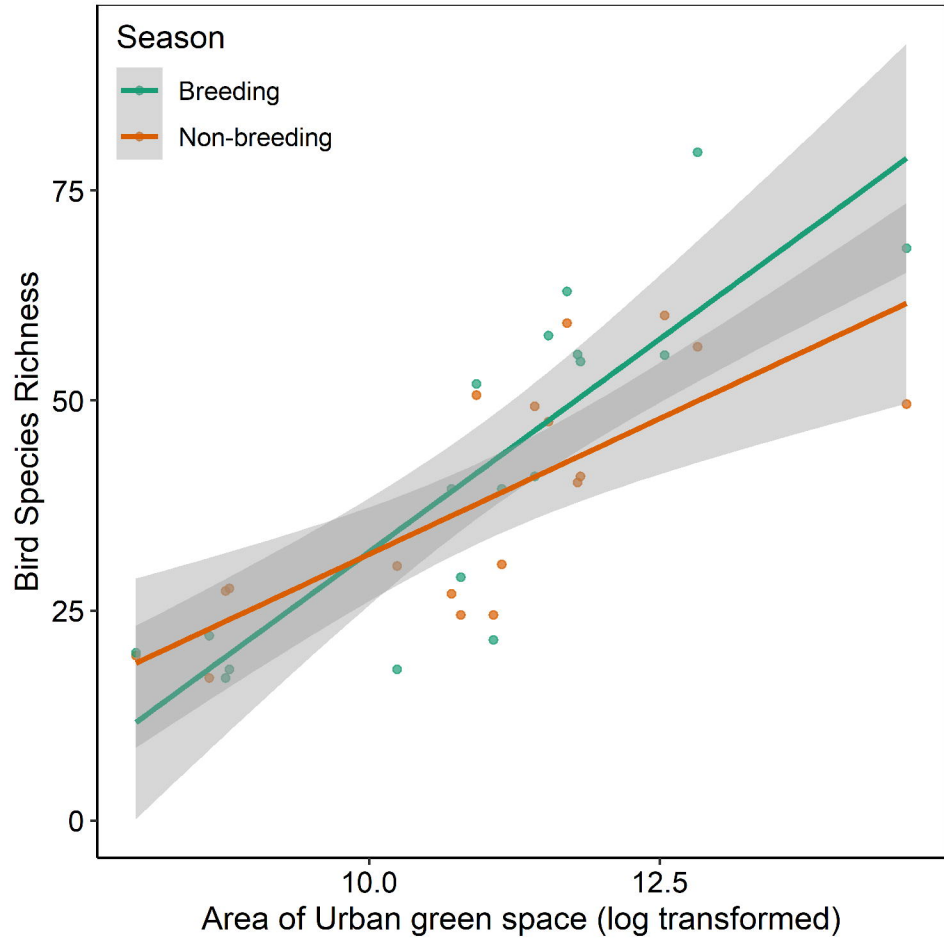

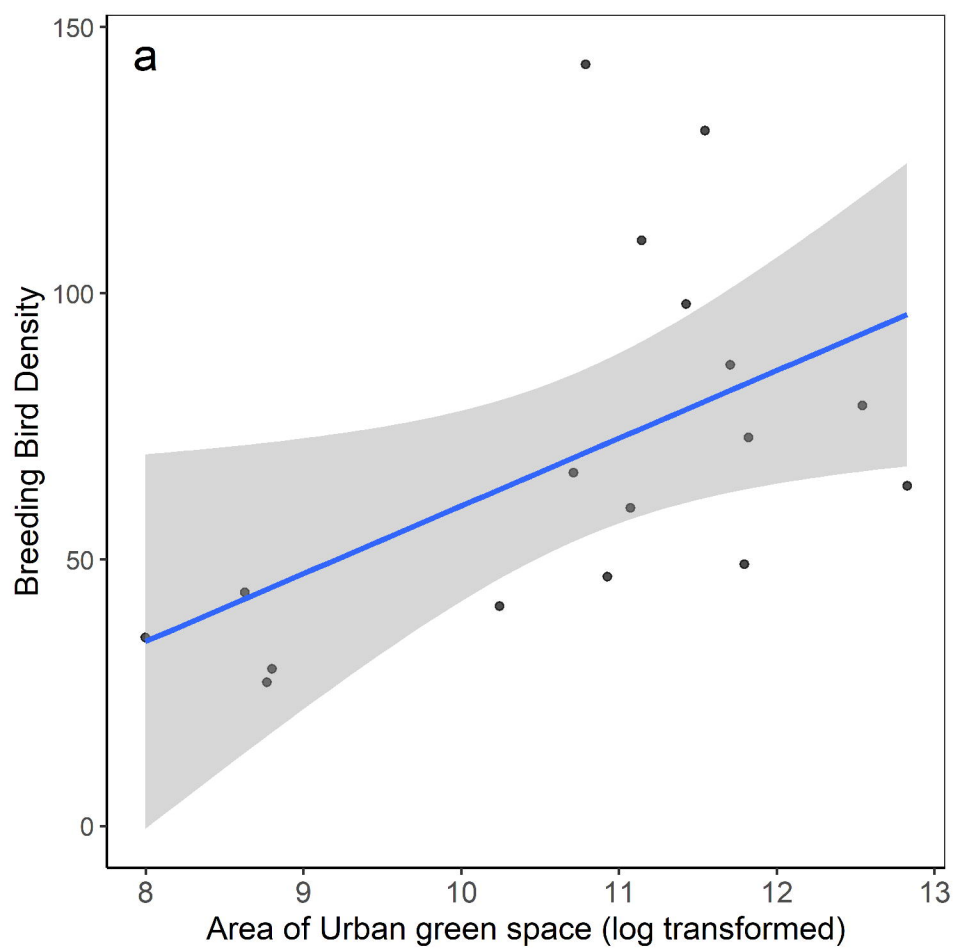

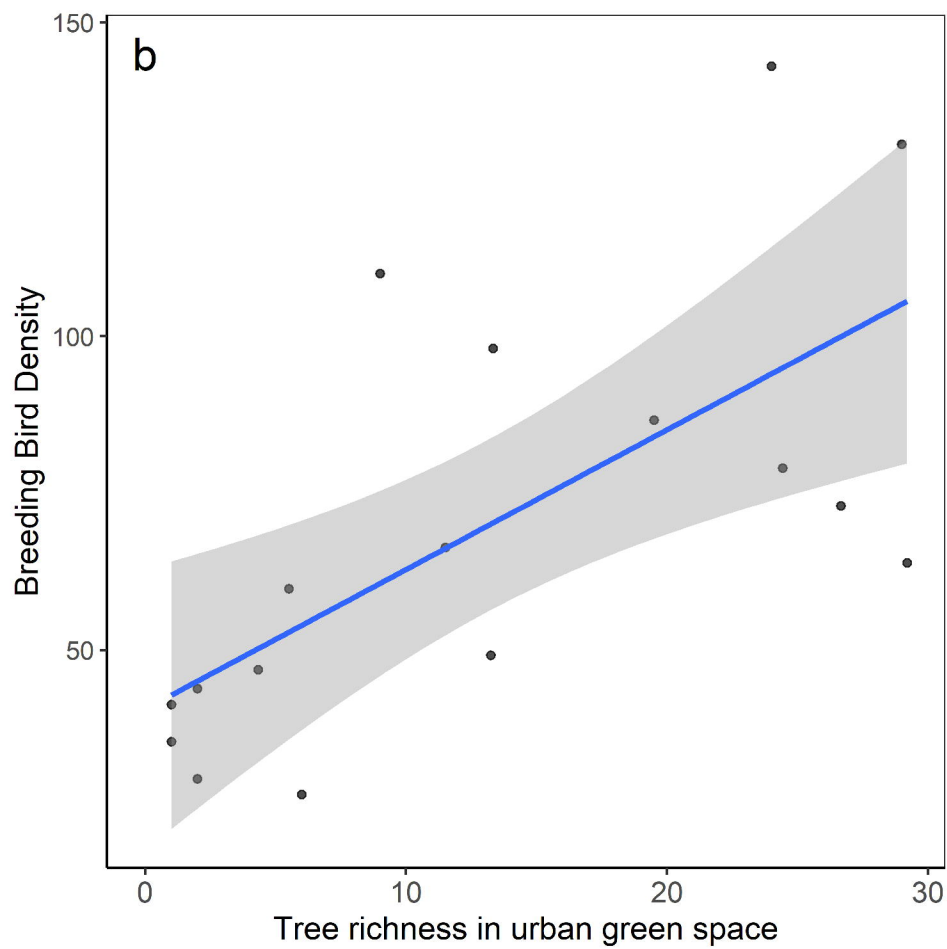

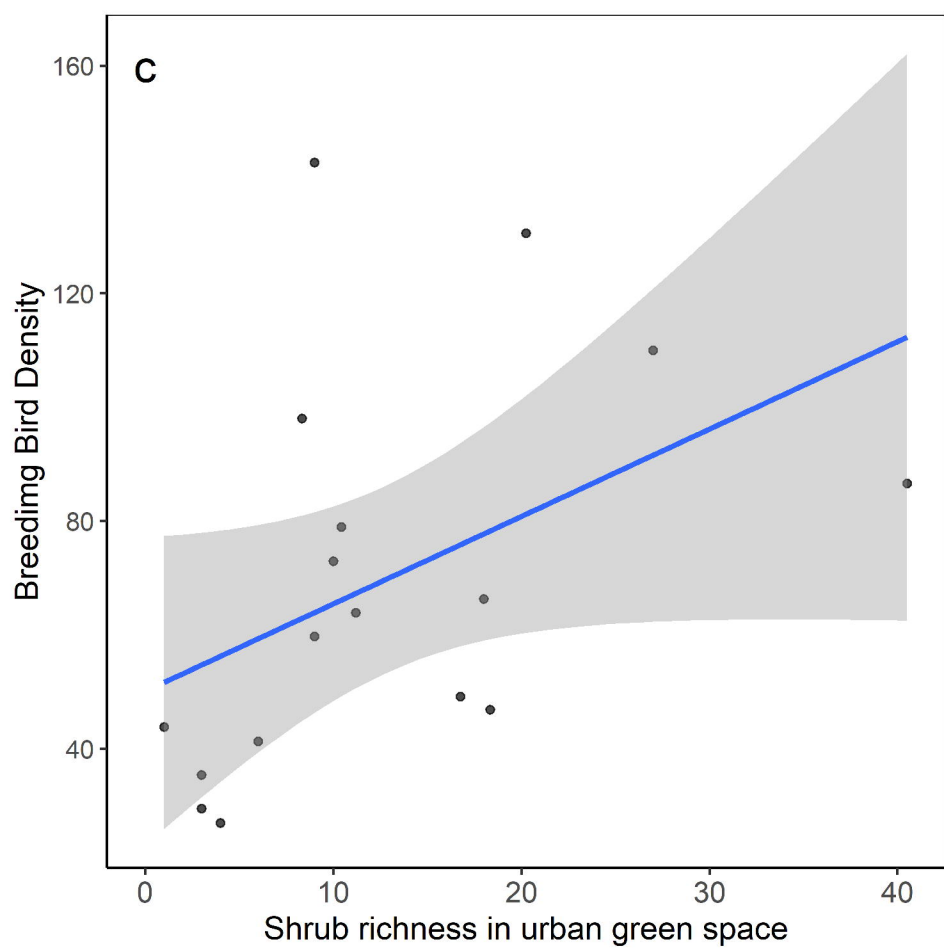

**d**

Non-breeding Bird Density

100

50

0

5

10

15

20

Percentage of Open area in matrix

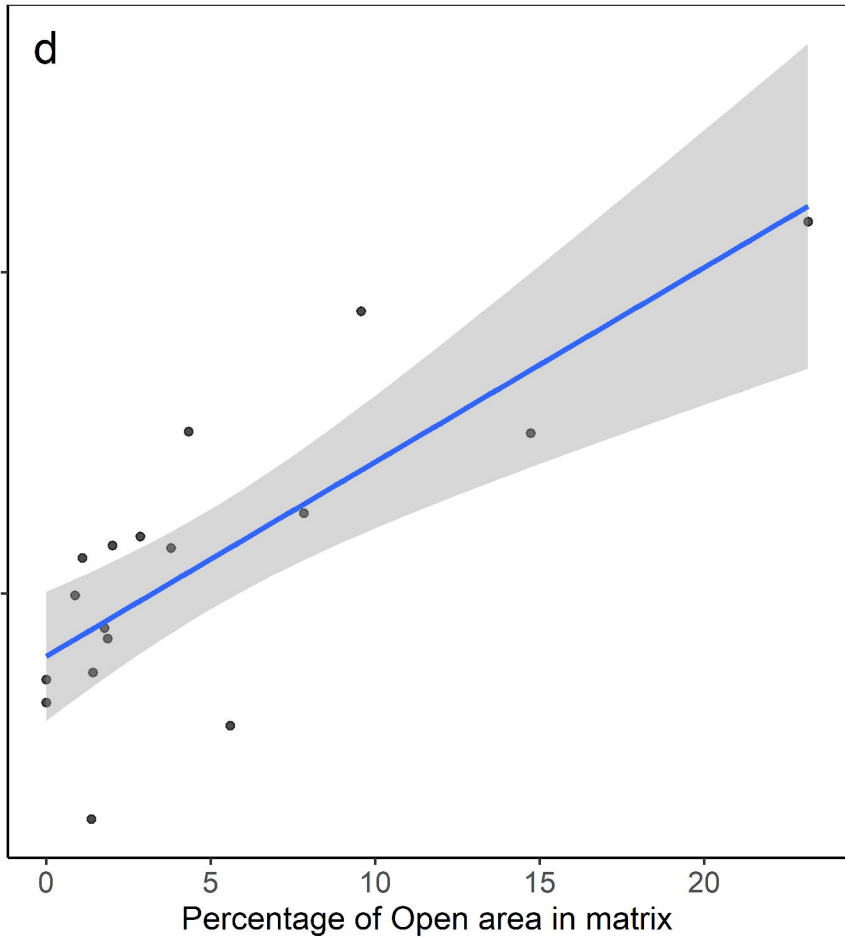

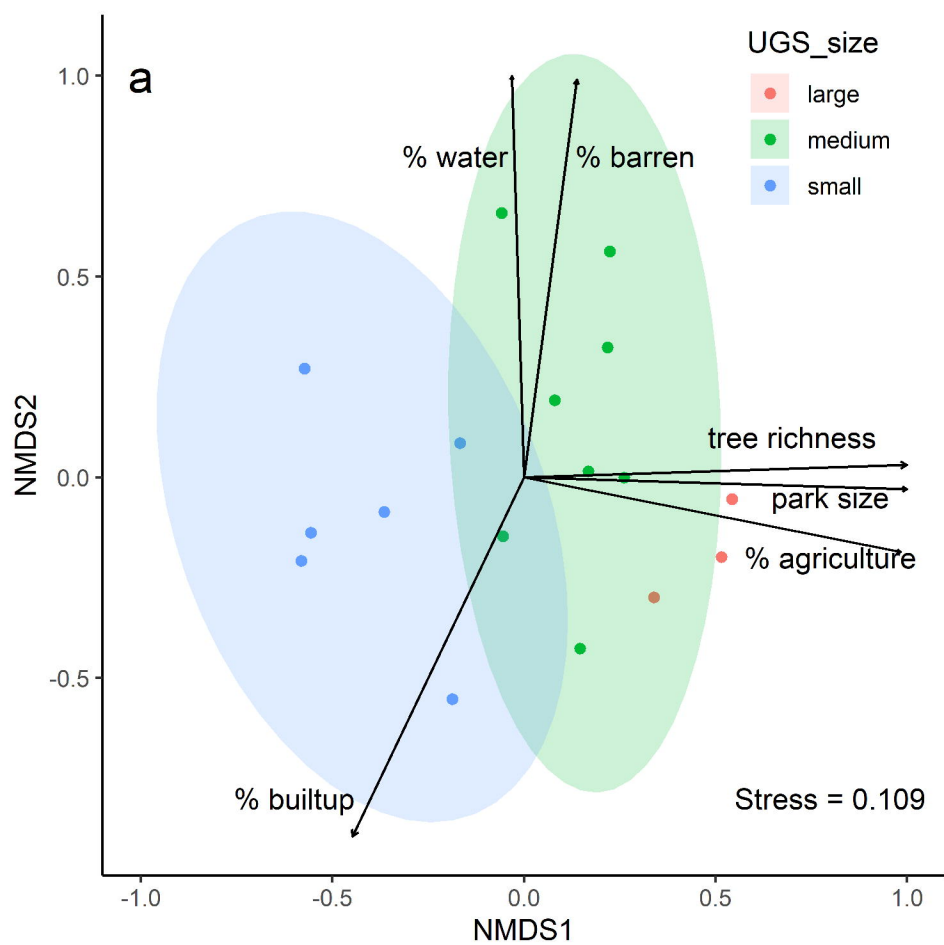



**b**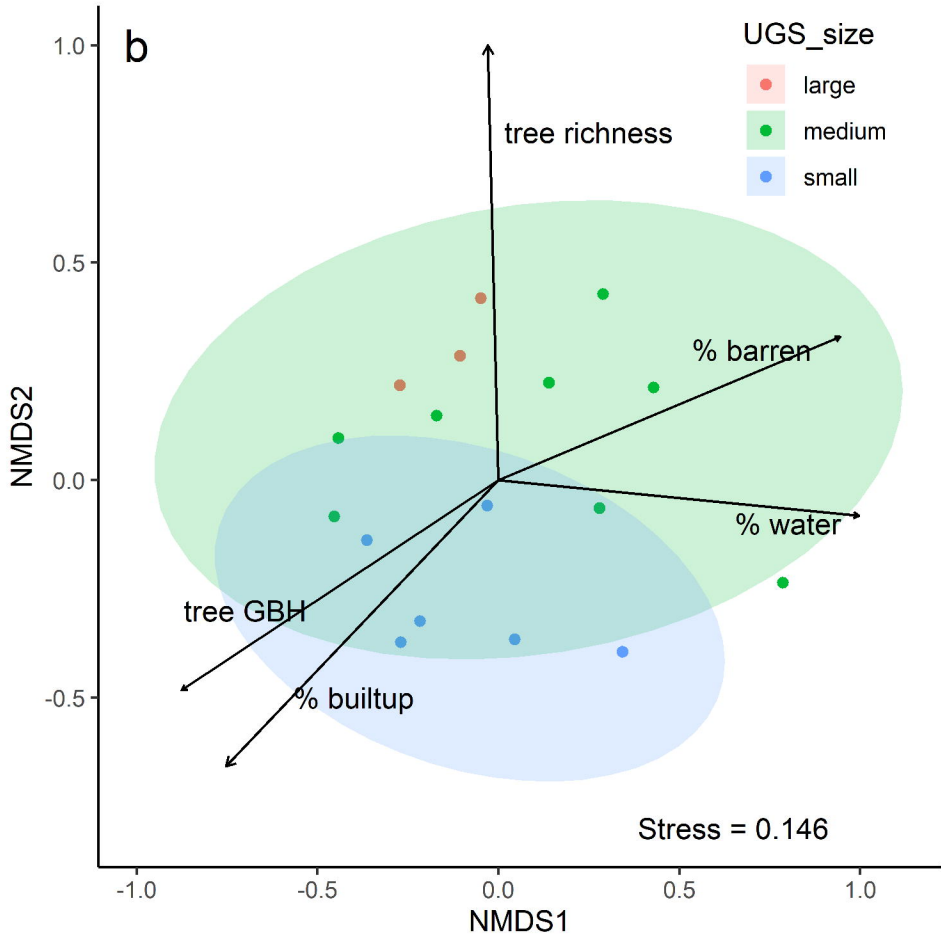

Source: http://biorxiv.org/content/10.1101/2020.10.23.348391v1.full.pdf
